# Supplementary material for: Task state representations in vmPFC mediate relevant and irrelevant value signals and their behavioral influence
Source: Springer Nature journal article supplement (doi:10.1038/s41467-023-38709-w), 2023-05-31
Supplement: MOESM1 [file 41467_2023_38709_MOESM1_ESM.pdf]

1380 **Supplementary Information**

- 1381 • Fig. [S1](#): Full procedure and experimental design for all phases, related to Fig [1](#)
- 1382 • Fig. [S2](#): Nested RT models (EV, Context, Block and switch) related to Fig [2](#)
- 1383 • Fig. [S3](#): Alternative RT models, extended RT model comparisons and correlation matrix of all
- 1384 regressors, related to Fig [2](#)
- 1385 • Fig. [S4](#): Exploratory analysis of RT model presented in Main Text, related to Fig [2](#)
- 1386 • Fig. [S5](#): Behavioral accuracy results: related to Fig [2](#)
- 1387 • Fig. [S6](#): Frequency bias in the design and supplementary information for Representational
- 1388 Similarity Analysis: related to Fig. [5](#) and Fig. [3](#)
- 1389 • Fig. [S7](#): Supplementary information for Value similarity analysis: related to Fig. [4](#) and Fig. [5](#)
- 1390 • Fig. [S8](#): Supplementary information for perceptual similarity analysis: related to Fig. [4](#) and Fig. [5](#)
- 1391 • Fig. [S9](#): Modelling probability assigned to the EV class: related to Fig. [5](#)
- 1392 • Fig. [S10](#): Main effects and corresponding data, fMRI effects, related to Fig. [5](#)
- 1393 • Fig. [S11](#): Main effects and corresponding data, link of fMRI to behavioral accuracy, related to
- 1394 Fig. [6](#)
- 1395 • Fig. [S12](#): Main univariate results
- 1396 • Fig. [S13](#): Additional univariate results,
- 1397 • Table [S1](#): Detailed univariate results: Clusters for whole brain univariate analysis
- 1398 • Effect sizes and confidence intervals for best explaining models:
  - 1399 – Table [S2](#): RT model
  - 1400 – Table [S3](#): fMRI model ( $P_{EV}$ , main model)
  - 1401 – Table [S4](#): fMRI model ( $P_{EV}$ , nested in  $EV_{back}$ )
  - 1402 – Table [S5](#): RSA model - Main effect models
  - 1403 – Table [S6](#): RSA model - Main effect models value difference models

1404 Source data for all figures are provided as a Source Data file.

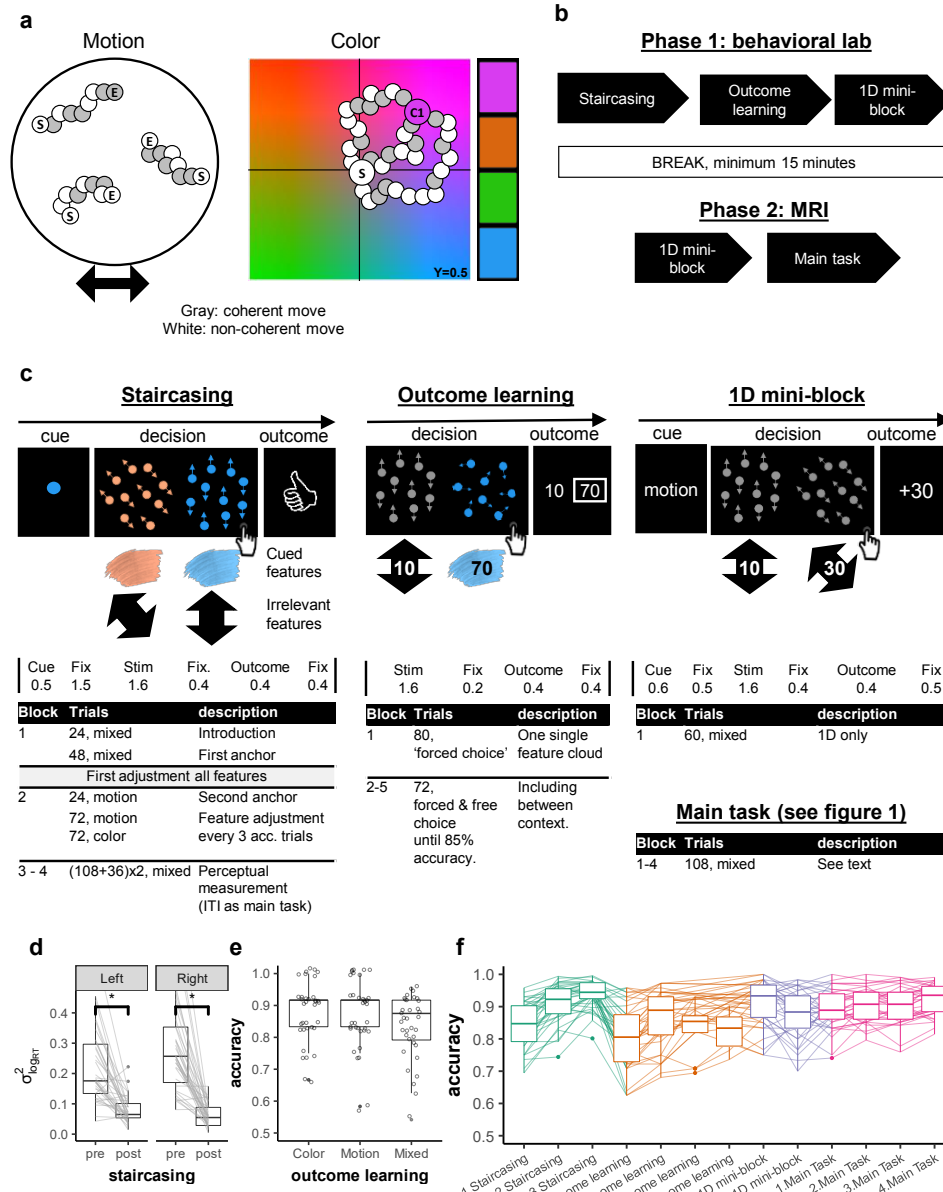

Figure S1: Full procedure and experimental design for all phases

1405 **Figure S1:** Full procedure and experimental design for all phases, related to Fig 1. a. Brownian  
 1406 algorithm for color and motion. Each illustration shows the course of 3 example dots; 'S' and 'E' marked  
 1407 dots reflect Start and End positions, respectively. Remaining dots represent location in space for different  
 1408 frames. Left panel: Horizontal motion trial. Shown are framewise dot positions between start and end. In  
 1409 each frame, a different set of dots moved coherently in the designated direction (gray) with a fixed speed;  
 1410 remaining dots moved in a random direction [conceptually taken from 45]. Right panel: Example of a  
 1411 pink color trial. We simulated the YCbCr color space that is believed to represent the human perception  
 1412 in a relative accurate way [cf. 65]. A fixed luminance of  $Y = 0.5$  was used. For technical reasons we  
 1413 sliced the X-axis by 0.1 on each side and the Y-axis by 0.2 from the bottom of the space to ensure the

1414 middle of the space remained gray given the chosen luminance. In each frame, a different set of dots  
1415 (always 30% of the dots) moved coherently towards the target color in a certain speed whereas the rest  
1416 were assigned with a random direction. All target colors were offset by 23.75% from the center towards  
1417 each corner. Right bar illustrates the used target colors. **b. Full procedure.** The experiment consisted of  
1418 two phases, the first one took place in the behavioral lab and included Staircasing, Outcome-learning and  
1419 the first 1D mini-block. The second took place inside the MRI scanner and consisted of the second 1D  
1420 mini-block and the main task. **c. Example trial procedures and timing of the different tasks.** Timing  
1421 of each trial is depicted below illustrations. **Staircasing (left)** Each trial started with a cue of the  
1422 relevant feature. Each cloud had one or two features (motion and/or color) and participants had to  
1423 detect the cued feature. Participants' task was to choose the cued feature (here: blue). After a choice,  
1424 participants received feedback if they were correct and faster than 1 second, correct and slower, or wrong.  
1425 **Outcome learning (middle)** Participants were presented with either one or two single-feature clouds  
1426 and asked to choose the highest valued feature. Following their choice, they were presented with the values  
1427 of both clouds, with the chosen cloud's associated value marked with a square around it. The pair of  
1428 shown stimuli included across contexts comparisons, e.g. between up/right and blue, as shown. **1D mini**  
1429 **block (right)** At the end of the first phase and beginning of the second phase participants completed  
1430 a mini-block of 60 1D trials during the anatomical scan (30 color-only, 30 motion-only, interleaved).  
1431 Participants were again asked to make a value-based two alternative forced choice choice decision. In  
1432 each trial, they were first presented with a contextual cue (color/motion), followed by the presentation of  
1433 two single-feature clouds of the cued context. After a choice, they were presented with the chosen-cloud's  
1434 value. No BOLD response was measured during these blocks and timing of the trials was fixed and  
1435 shorter than in the main task (see Main task preparation in methods) **Main task (bottom)** This part  
1436 included 4 blocks, each consisting of 36 1D and 72 2D trials trials presented in an interleaved fashion  
1437 (see method and Fig. 1). **d. Button specific reduction in RT variance following the staircasing.** We  
1438 verified that the staircasing procedure also reduced differences in detection speed between features when  
1439 testing each button separately. Depicted is the variance of reaction times (RTs) across different color and  
1440 motion features (y axis). While participants' RTs were markedly different for different features before  
1441 staircasing (pre), a significant reduction in RT differences was observed after the procedure (post, paired  
1442 t-test:  $p < .001$ ,  $N=35$ ) **e. Choice accuracy in outcome learning trials.** Participants achieved near ceiling  
1443 accuracy in choosing the highest valued feature in the outcome learning task, also when testing for color,  
1444 motion and mixed trials separately ( $ps < .001$ ,  $N=35$ ). Mixed trials only appeared in this part of the  
1445 experiment to encourage mapping of the values on similar scales. **f. Accuracy throughout the experiment,**  
1446 plotted for each block of each part of the experiment. *In the staircasing (left)* High accuracy for the  
1447 adjustment and measurement blocks (2-3) ensured that there were no difficulties in perceptual detection  
1448 of the features. *In Outcome learning* a clear increase in accuracy throughout this task indicated learning  
1449 of feature-outcome associations. Note that Block 5 of this part was only included for those who did  
1450 not achieve 85% accuracy beforehand. Starting the *1D mini blocks* (middle) and throughout the *main*  
1451 *task* (right) until the end of the experiment high accuracy.  $\mu$  and  $\sigma$  from left to right: Staircasing:

1452 .84,.07;.91,.06;.94,.04; Outcome Learning: .81,.1;.86,.09;.83,.08;.82,.06; 1D mini blocks: .91,.07;.88,.08;  
1453 Main task: .89,.06;.91,.05;.9,.06;.92,.05.; N=35. In panels d-f boxes mid-line represent mean, lower and  
1454 upper the 25th and 75th percentile and whiskers extend to the range of the data (no more than 1.5 of  
1455 the full box range). Data beyond the whiskers are plotted individually as solid points. Source data are  
1456 provided as a Source Data file.

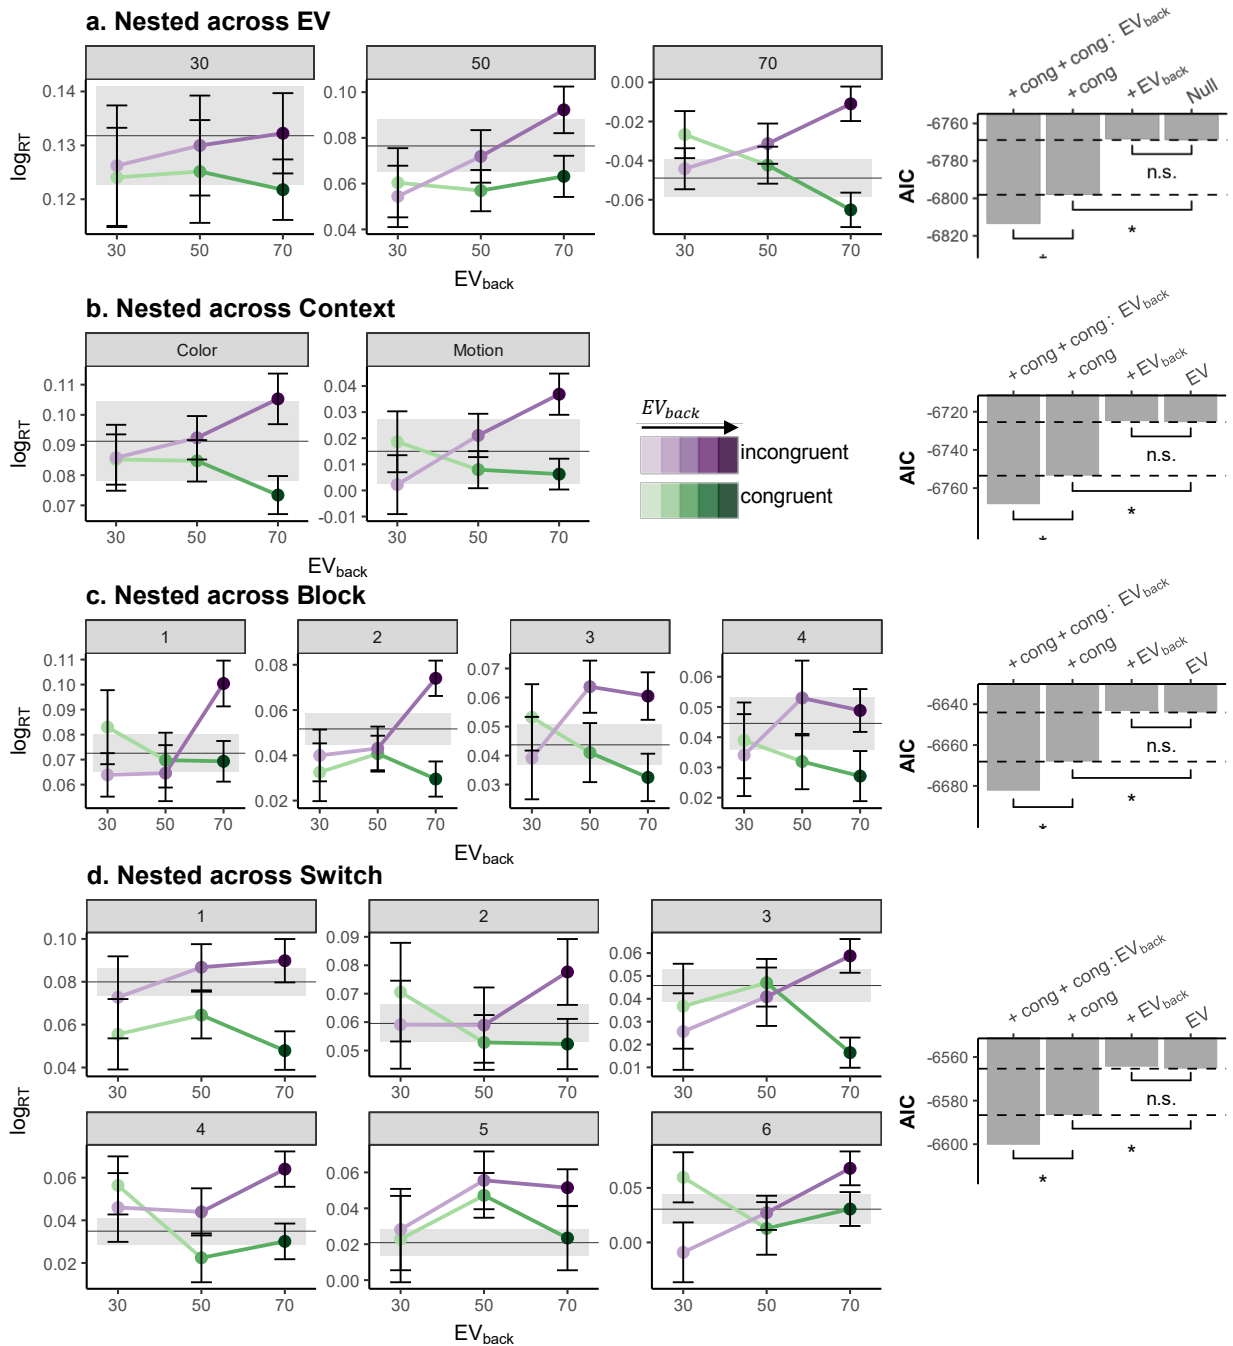

Figure S2: Nested RT models, related to Fig 2

1457 Figure S2: Nested RT models, related to Fig 2  
 1458 a-d. Nested models within Factors. Each row represents one congruency analysis, done separately  
 1459 for each level of expected value (a, top row), context (b, 2nd row), block (c, 3rd row) or switch (d,  
 1460 bottom row). The RT effect of Congruency  $\times$   $EV_{back}$  is shown on the left, corresponding AICs for mixed  
 1461 effect models with nested factors are shown on the right. Mean RT (line) and SEM (shades) for the

1462 corresponding 1D trials is plotted in gray for each panel (e.g. mean across all 1D trials where EV=30 are  
1463 on top left panel). Error bars assigned to colored lines and gray error band represent corrected within  
1464 subject SEMs [46, 47]. Null models shown on the right are identical to Eq. 2, albeit included  $\zeta_{0kv}$ , which  
1465 is the factor-specific ( $v$ ) intercept nested within each within each subject level (see methods). Likelihood  
1466 ratio tests were performed to assess improved model fit when adding (1) Congruency or (2)  $EV_{back}$  terms  
1467 to the Null model and when adding (3) Congruency  $\times$   $EV_{back}$  in addition to Congruency. Stars represent  
1468  $p$  values less than .05. For nested within EV, the Null model did not include a main effect for EV and the  
1469 likelihood ratio (LR) tests with added term: (1)  $\chi^2_{(1)} = 31.22, p < .001$ ; (2)  $\chi^2_{(1)} = 1.47, p = .226$ ; (3)  
1470  $\chi^2_{(1)} = 19.37, p < .001$ ; For models nested within Context the LR test was: (1)  $\chi^2_{(1)} = 30.01, p < .001$ ;  
1471 (2)  $\chi^2_{(1)} = 1.5, p = .22$ ; (3)  $\chi^2_{(1)} = 18.9, p < .001$ ; For models nested within Block: (1)  $\chi^2_{(1)} = 26.06,$   
1472  $p < .001$ ; (2)  $\chi^2_{(1)} = 1.27, p = .26$ ; (3)  $\chi^2_{(1)} = 18.25, p < .001$ ; And for models nested within switch:  
1473 (1)  $\chi^2_{(1)} = 23.29, p < .001$ ; (2)  $\chi^2_{(1)} = 1.13, p = .29$ ; (3)  $\chi^2_{(1)} = 17.66, p < .001$ ;,  $N=35$  for all panels  
1474 and models. In the first row (nested across EV) the interaction with EV is visible, i.e. the higher the EV,  
1475 the stronger our effects of interests were. Source data are provided as a Source Data file.

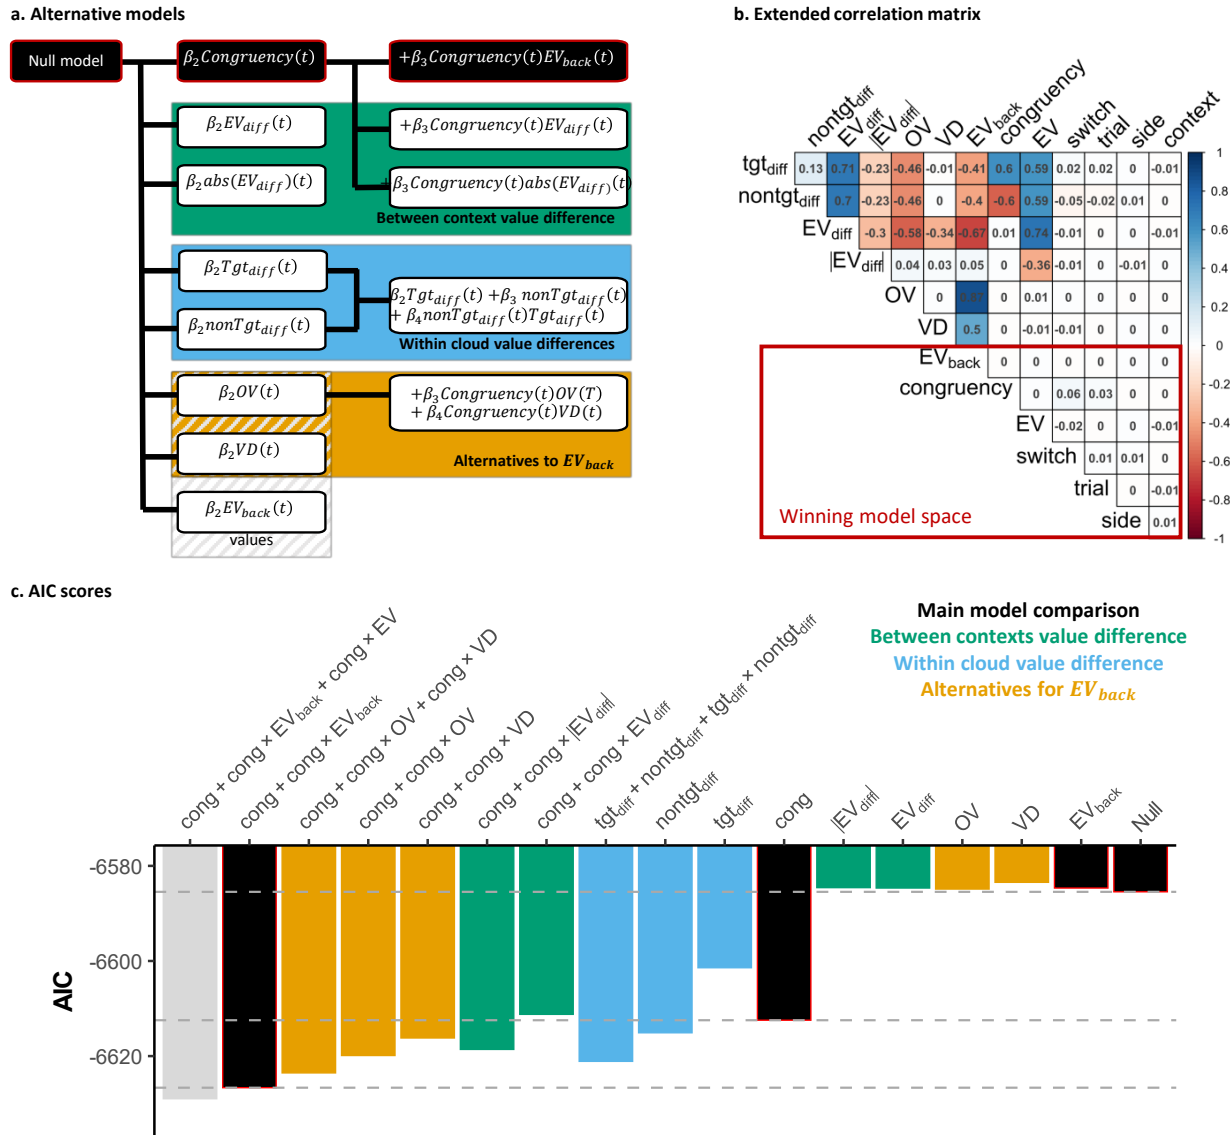

Figure S3: Alternative RT models, extended RT model comparisons and correlation matrix of all regressors, related to Fig 2.

1476 Figure S3: Alternative RT models, extended RT model comparisons and correlation matrix of  
 1477 all regressors, related to Fig 2.

1478 a. Alternative mixed effect models, each represented as a row which lists main factors of interest. We  
 1479 clustered different alternative models into three classes: *Green models* included factors that reflected the  
 1480 difference between the expected values of both contexts (EV - EV<sub>back</sub>, including unsigned EV factors);  
 1481 *blue* models include instead factor that reflect the value-difference between context within each cloud  
 1482 where 'tgt' (target) is the chosen cloud with the highest value according to the relevant context and  
 1483 *orange* models included two alternative parameterization of values in the non-relevant context: irrelevant  
 1484 features' Value Difference (VD) and Overall Value (OV), which are also orthogonal to Congruency (Cong),  
 1485 and to each other. *In black* is the main model comparison as presented in the main text. b. **Extended**

1486 **correlation matrix.** Averaged correlation across subjects of all scaled regressors for accurate 2D trials  
1487 (models' input). Marked in red rectangle are main factors of the experiment which are orthogonal by  
1488 design and used for the model comparison reported in the Main Text. **c. AIC scores.** We tested different  
1489 alternatives shown in (a) in a stepwise hierarchical model comparison, as in the main text. Each bar  
1490 represents the AIC (y-axis) of a different model (x-axis) where the labels on the x-axis depict the added  
1491 terms to the Null model for that specific model. The Null model included nuisance regressors and the main  
1492 effect of EV (see  $\nu$  and  $\beta_1$  in Eq. 2). The models described in the main text are shown in black. The gray  
1493 model includes the additional term for Congruency  $\times$  EV. Dashed lines correspond to the AIC values of  
1494 the models used in the main text. Importantly, no main effect representing only the contextually irrelevant  
1495 values (VD, OV,  $EV_{\text{back}}$ ) nor the difference between the EVs ( $EV_{\text{diff}}$ ,  $|EV_{\text{diff}}|$ , also when excluding EV from  
1496 the null model, not presented) improved model fit over the Null model. This supports our finding that  
1497 neither large irrelevant values, nor their similarity to the objective EV, influenced participants' behavior.  
1498 Similar to  $EV_{\text{back}}$ , factors from the green and orange clusters are also orthogonal to Congruency, which  
1499 allowed us to test their interaction. Factors from the blue cluster highly correlate with both Congruency  
1500 (and  $EV_{\text{back}}$ ) and therefore were tested separately. None of the alternatives provided a better AIC score (y  
1501 axis, lower is better). Source data are provided as a Source Data file.



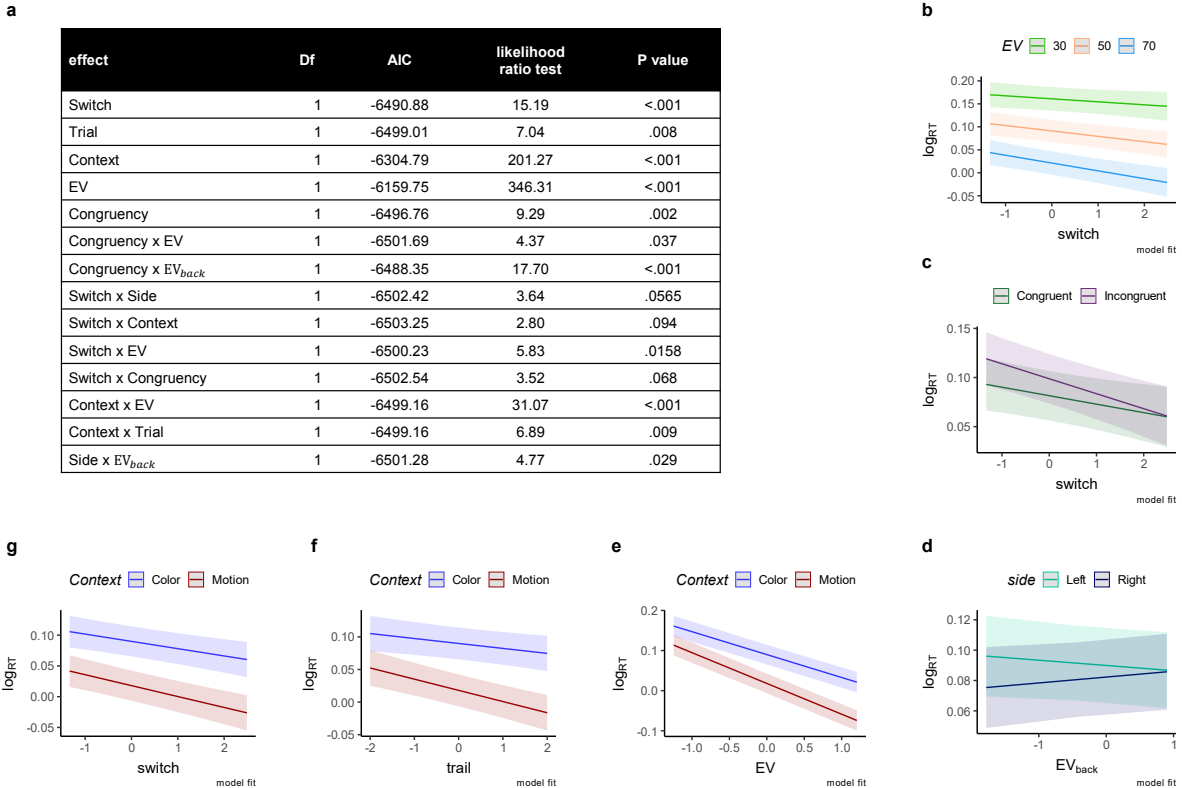

Figure S4: Exploratory analysis of RT model presented in Main Text, related to Fig 2.

1502 Figure S4: Exploratory analysis of RT model presented in Main Text, related to Fig 2.

1503 a. The table presents the individual contribution of terms taken from Eq. 2 and all possible two-way

1504 interactions to the model fit using the drop1 function in R [68]. In short, this exploratory analysis started

1505 with a model that included all main effects from Eq. 2 and all possible 2-way interaction between them

1506 and tested which terms contribute to the fit. If a term did not improve fit, it was dropped from the

1507 model. Presented are all effects with p value less than  $p < .01$  for likelihood ratio test with added

1508 terms. Additionally, we specifically tested if the switch interacts with our main effect and found no

1509 such interaction (likelihood-ratio test with added term for Congruency  $\times$   $EV_{back}$   $\times$  switch:  $\chi^2_{(1)} = 3.70$ ,

1510  $p = .157$ ). **b-g.** Model fits of all effects with  $p < .01$  for likelihood ratio test with added terms. X-axes

1511 are normalized (as in the model) and y-axes reflect RTs on a log scale (model input). Clockwise from

1512 the top: RTs became progressively faster with increasing trials since the context switch. This effect was

1513 possibly stronger for higher EV (b) and for incongruent trials (c). We note that our experiment was not

1514 designed to test the effect of the switch. (d) An interaction of Side and  $EV_{back}$  was found, for which we

1515 offer no explanation. Panels (e) to (g) reflect interaction of context with EV (e), trial (f), and switch (g).

1516 In panels b-g error bands represent the 89% confidence interval. P values of each effect are found in the

1517 table in panel (a). We note that due to the used perceptual color space there might be a context-specific

1518 ceiling effect in RTs due to training throughout the task which could have induced effects of context.

1519 Specifically, since dots start gray and slowly 'gain' the color, it might take a few frames until there is

1520 any evidence for color. However, the motion could be theoretically detected already on the second frame  
1521 (since coherence was very high). This could explain why some effects that represent decrease in RT might  
1522 hit a boundary for color (and not motion). Crucially, we refer the reader to supplementary Fig [S2](#) where  
1523 the main model comparison hold also when we ran the model nested within the levels of Context. Source  
1524 data are provided as a Source Data file.

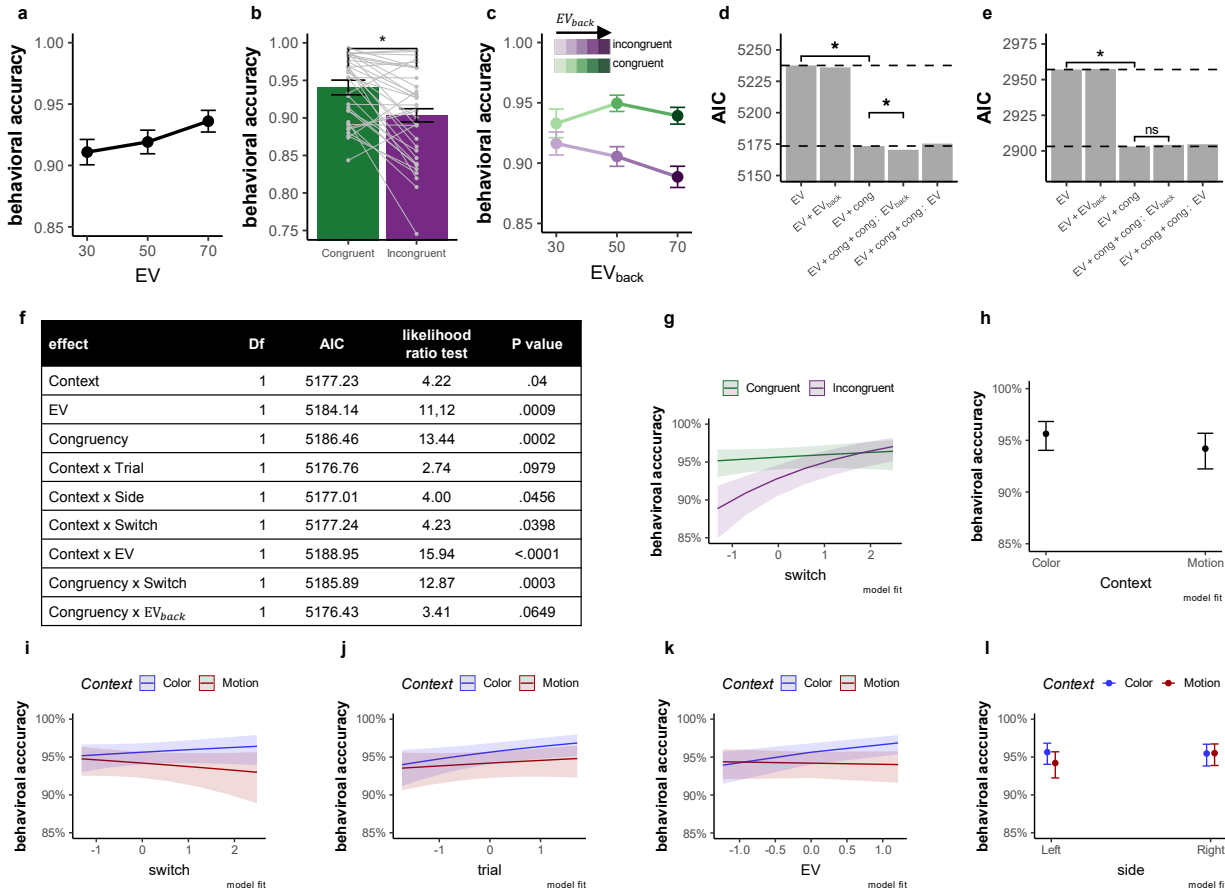

Figure S5: Behavioral accuracy results: related to Fig 2

1525 Figure S5: Behavioral accuracy results: related to Fig 2.

1526 a. Comparison of accuracy (y-axis) for each level of EV (x-axis) showed that participants were more  
 1527 accurate for higher EV, likelihood ratio test against null model:  $p = .001$ ,  $N=35$ . b. Comparison of  
 1528 congruent versus incongruent trials also revealed a performance benefit of the former, paired t-test:  
 1529  $p = .001$ ,  $N=35$ . c. The effect of Congruency was modulated by  $EV_{back}$ , i.e. the more participants could  
 1530 expect to receive from the ignored context, the less accurate they were when the contexts disagreed (x  
 1531 axis, shades of colours). Further investigations revealed that the modulation of  $EV_{back}$  is likely limited to  
 1532 Incongruent trials (likelihood ratio test with added term:  $\chi^2_{(1)} = 6.91$ ,  $p = .009$ ,  $N=35$ , when modeling  
 1533 only Incongruent trials), yet does not increase accuracy for Congruent trials (likelihood ratio test with  
 1534 added term:  $\chi^2_{(1)} = 0.07$ ,  $p = .794$ ,  $N=35$ , when modeling only congruent trials), likely due to a ceiling  
 1535 effect. Error bars in panels a-c represent corrected within subject SEMs [46, 47]. d. Hierarchical model  
 1536 comparison of choice accuracy, similar to the RT model reported in the main text. These analyses showed  
 1537 that including Congruency improved model fit (likelihood-ratio test with added term:  $p < .001$ ,  $N=35$ ).  
 1538 Including the additional interaction of Congruency  $\times$   $EV_{back}$  improved the fit even more (likelihood-ratio  
 1539 test with added term:  $p = .03$ ,  $N=35$ ). e. We replicated the choice accuracy main effect in an independent  
 1540 sample of 21 participants outside of the MRI scanner, i.e. including Congruency improved model fit

1541 (likelihood-ratio test with added term:  $\chi^2_{(1)} = 55.95, p < .001$ ). We did not find a main effect of EV on  
1542 accuracy in this sample (likelihood-ratio test with added term:  $\chi^2_{(1)} = 0.93, p = .333$ ). The interaction  
1543 term Congruency  $\times$  EV<sub>back</sub> did not significantly improve fit in this sample. Modeling only Incongruent  
1544 trials, as above, revealed that EV<sub>back</sub> had a marginal effect on accuracy (likelihood-ratio test with added  
1545 term:  $\chi^2_{(1)} = 2.90, p = .088$ ). Near-ceiling accuracies in Congruent trials in combination with a smaller  
1546 sample might have masked the effects. **f.** The table presents the individual contribution of terms taken  
1547 from Eq. 3 and all possible two-way interactions to the model fit using the drop1 function in R [68].  
1548 In short, this exploratory analysis started with a model that included all main effects from Eq. 3 and  
1549 all possible 2-way interaction between them and tested which terms contribute to the fit. If a term did  
1550 not improve fit, it was dropped from the model. Subsequent panels present all the effects corresponding  
1551 to  $p < .01$ . Note that this is a non-hypothesis driven exploration of the data and that accuracy was  
1552 very high in general throughout the main task. **g.** Accuracy as a function of time since switch. Akin  
1553 to RTs, accuracy increased with number of trials since the last context switch, mainly for incongruent  
1554 trials. **h.** Context effect on accuracy. According to the exploratory model, participants were slightly more  
1555 accurate in color than in motion trials. However, a direct paired t test between average accuracy of  
1556 color compared to motion was not significant (paired t-test:  $t_{(34)} = 0.96, p = .345, N=35$ ). Error bars  
1557 represent corrected within subject SEMs [46, 47]. **i-l.** Depicted are some minor interactions of no interest  
1558 with Context, according to the exploratory model, N=35 for all panels. Error bars and bands in panels g-l  
1559 correspond to 89% confidence interval. Source data are provided as a Source Data file.

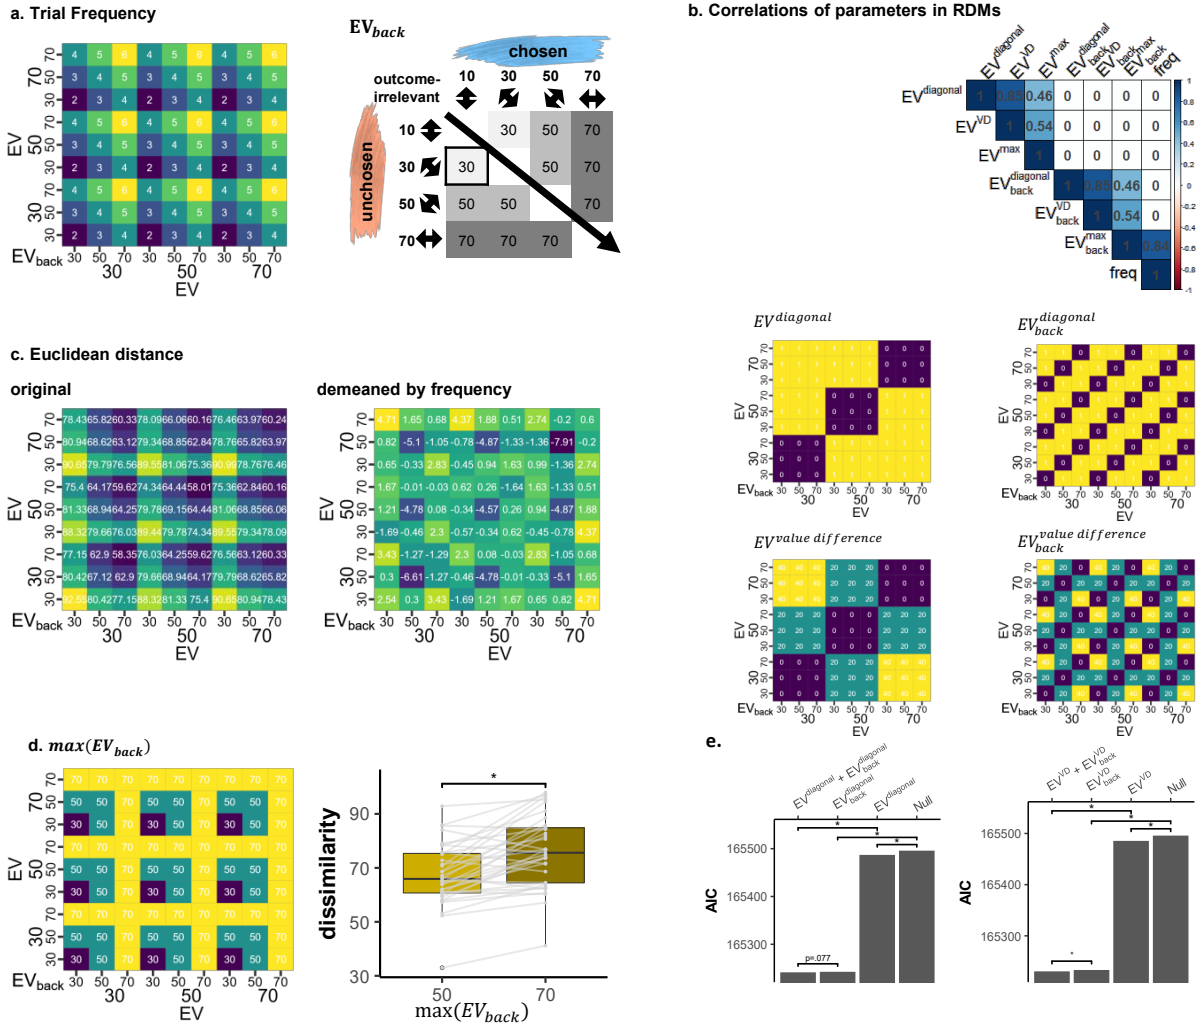

Figure S6: Frequency bias in the design and supplementary information for Representational Similarity Analysis: related to Fig. 5 and Fig. 3

1560 Fig. S6: Frequency bias in the design and supplementary information for Representational  
 1561 Similarity Analysis: related to Fig. 3 a-b Panel a shows the frequency of unique examples within  
 1562 2D trials (for each context). Panel b is taken from Fig. 1e. to help with visualization. Each cell shows  
 1563 the number of how many trials were used for to both the betas that correspond to that cell (presented  
 1564 as ratio relative to the rest). As can be seen, our design included more trials for higher  $EV_{back}$ . We  
 1565 believe this is the reason why the probabilities the classifier trained on 2D trials were biased. Note that  
 1566 the analyses depicted in Fig. 5g-i. was conducted nested within the levels of  $EV_{back}$ , thus eliminating  
 1567 influences of frequency of trials (henceforth: Frequency) from the probability of the  $EV_{back}$  classifier.  
 1568 Additionally, all RSA models were conducted nested within the levels of Frequency, meaning all effects  
 1569 found go beyond any mean difference resulting from the frequency bias. c Correlations of parameters  
 1570 used in the RSA analyses show that all the main and value difference parameters are orthogonal to the  
 1571 frequency effect. Added below the correlations are the effects taken from Fig. 3 to help with visualization.

1572 **d.** In order to replicate the effect found in Fig. 5b, when focusing only on the cells corresponding to the  
1573 same EV (i.e. corresponding to the diagonal in the EV main effect matrix), only one level of Frequency  
1574 (4) has two separate levels of  $\max_{back}^{EV}$  (parameter indicating which is the maximum  $EV_{back}$  involved in  
1575 the comparison, explaining the high correlation in panel c). Nevertheless, when comparing these two  
1576 cells across subjects we find a positive effect of  $\max_{back}^{EV}$  indicating an increase in dissimilarity of EV  
1577 representation when  $\max_{back}^{EV}$  is higher, paired t-test:  $t_{(34)} = -5.42, p < .001, N=35$ . Boxes mid-line  
1578 represent median, lower and upper the 25th and 75th percentile and whiskers extend to the range of the  
1579 data (no more than 1.5 of the full box range). Data beyond the whiskers are plotted individually as solid  
1580 points. **e.** Hierarchical model comparison showing that the model with both Main effects (right) and  
1581 with both Value similarity effects (left) explain the data best. All models are nested within the levels  
1582 of frequency (see panel a). Likelihood-ratio-tests with added terms: For Diagonal effects models (left):  
1583 adding  $EV_{back}^{diagonal}$  to null model:  $\chi^2_{(1)} = 10.89, p = .001$ ; adding  $EV_{back}^{diagonal}$  to null model:  $\chi^2_{(1)} = 255.44,$   
1584  $p < .001$ ; adding  $EV_{back}^{diagonal}$  to the model with  $EV_{back}^{diagonal}$ :  $\chi^2_{(1)} = 3.12, p = .077$ . adding  $EV_{back}^{diagonal}$  to  
1585 the model with  $EV_{back}^{diagonal}$ :  $\chi^2_{(1)} = 247.67, p < .001$ ; For Value Difference models (VD, right): adding  
1586  $EV^{VD}$  to null model:  $\chi^2_{(1)} = 12.34, p < .001$ ; adding  $EV_{back}^{VD}$  to null model:  $\chi^2_{(1)} = 264.61, p < .001$ ;  
1587 adding  $EV^{VD}$  to the model with  $EV_{back}^{VD}$ :  $\chi^2_{(1)} = 4.71, p = .03$ ; adding  $EV_{back}^{VD}$  to the model with  $EV^{VD}$ :  
1588  $\chi^2_{(1)} = 256.98, p < .001$ . Stars in panels d-e represent the p-value is lower than conventional .05 threshold.  
1589 Source data are provided as a Source Data file.

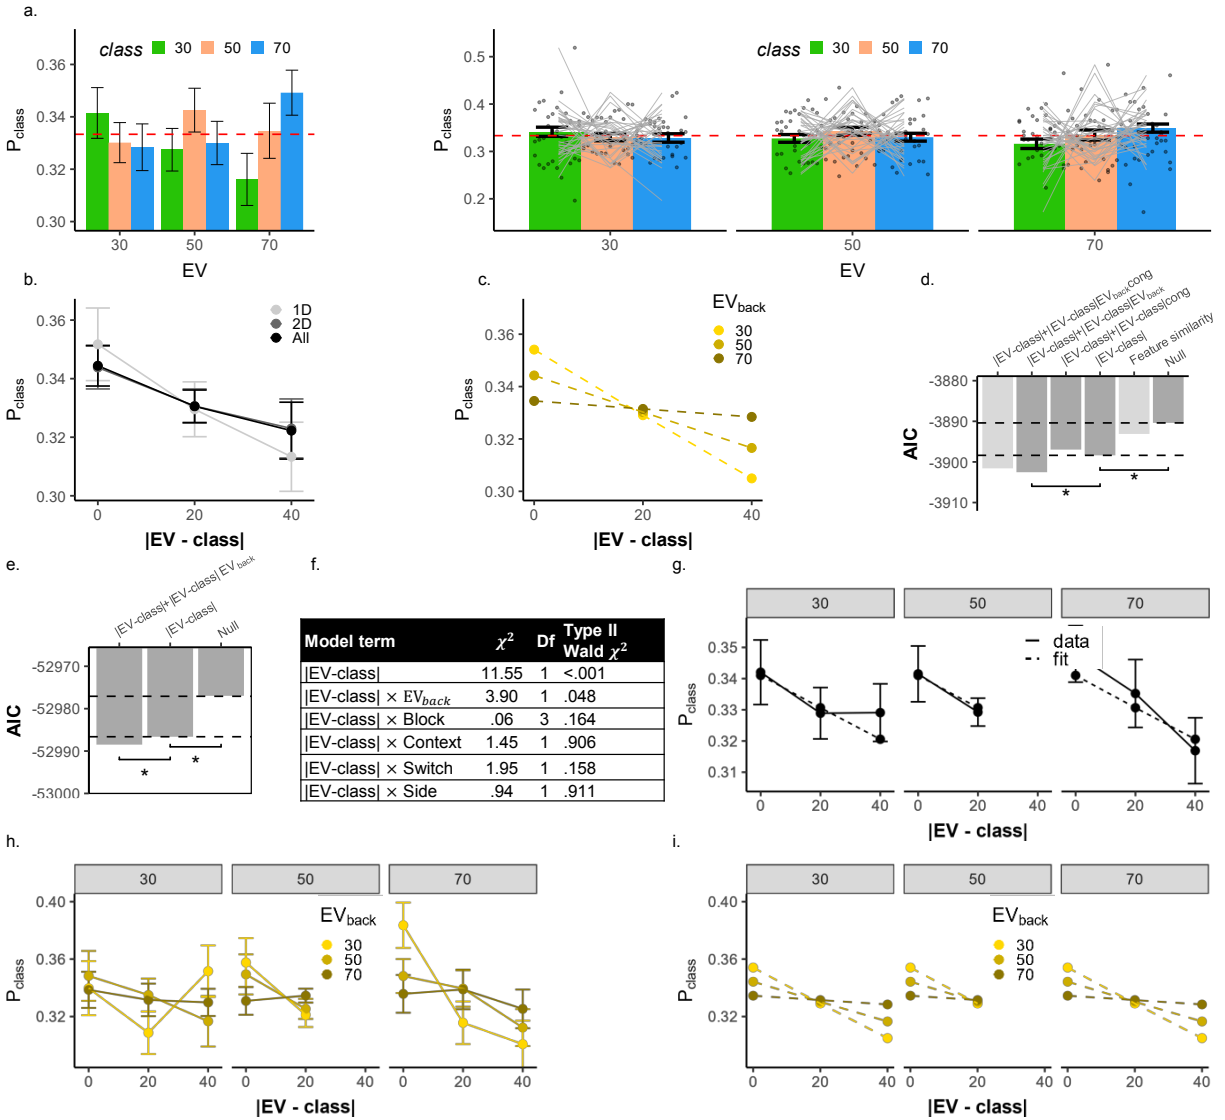

Figure S7: Supplementary information for value similarity analysis: related to Fig. 4 and Fig. 5

1590 Fig. S7: Supplementary information for Value similarity analysis: related to Fig. 4 and Fig. 5

1591 .

1592 Focusing on the Value classifier we asked whether EVs affected not only the probability of the corresponding  
 1593 class, but also influenced the full probability distribution predicted by the Value classifier. We reasoned  
 1594 that if the classifier is decoding the neural code of values, then similarity between the values assigned  
 1595 to the classes will yield similarity in probabilities associated to those classes. Specifically, we expected  
 1596 not only that the probability associated with the correct class be highest (e.g. '70'), but also that the  
 1597 probability associated with the closest class (e.g. '50') would be higher than the probability with the least  
 1598 similar class (e.g. '30', panel a, note that this difference also reflects which options were displayed vs not  
 1599 in a given trial). The following analyses model directly the class probabilities estimated by this classifier.

1600 Probabilities were modelled with beta regression mixed effects models [49]. For technical reasons, we  
1601 averaged across nuisance regressors used in behavioral analyses. An exploratory analysis of raw data  
1602 including nuisance variables showed that they had no influence and confirmed all model comparison results  
1603 reported (see Fig. S7). To test our hypothesis, we modelled the probabilities in each trial as a function  
1604 of the absolute difference between the objective EV of the trial and the class ( $|\text{EV-class}|$ , i.e. in the  
1605 above example with a correct class of 70, the probability for the class 50 will be modelled as condition  
1606  $70-50=20$  and the probability of 30 as  $70-30=40$ ). This analysis indeed revealed such a value similarity  
1607 effect ( $\chi^2_{(1)} = 12.74, p < .001$ ) also when tested separately on 1D and 2D trials ( $\chi^2_{(1)} = 14.22, p < .001,$   
1608  $\chi^2_{(1)} = 9.99, p = .002$ , respectively, panel d.). Note that the difference between  $|\text{EV-class}| = 20$  and  
1609  $|\text{EV-class}| = 40$  also reflects which options were displayed vs. not in a given trial. Careful analysis of  
1610 perceptual overlap, however, indicated that this could not explain our results (see below and SI).

1611 Our main hypothesis was that context-irrelevant values might directly influence neural codes of expected  
1612 value in the vmPFC. The experimentally manipulated background values in our task should therefore  
1613 interact with the EV probabilities decoded from vmPFC. We thus asked whether the above described  
1614 value similarity effect was influenced by  $\text{EV}_{\text{back}}$  and/ or Congruency in 2D trials. Analogous to our RT  
1615 analyses, we used a hierarchical model comparison approach and tested if the interaction of value similarity  
1616 with these factors improved model fit. We found that  $\text{EV}_{\text{back}}$ , but not Congruency, modulated the value  
1617 similarity effect ( $\chi^2_{(1)} = 6.16, p = .013, \chi^2_{(1)} = .58, p = .446$ , respectively, panel d). This effect indicated  
1618 that the higher the  $\text{EV}_{\text{back}}$  was, the less steep was the value similarity effect. These results also hold  
1619 when running the models nested within the levels of EV (panels g-i). Additional control analyses included  
1620 perceptual models that merely encoded the amount of perceptual overlap between each training class and  
1621 2D testing as well as the presence of the perceptual feature corresponding to  $\text{EV}_{\text{back}}$  in the training class.  
1622 These analyses indicated that our classifier was indeed sensitive to values and not only to the perceptual  
1623 features the values were associated with, see S8 for details.

1624 **a.** Analyses of all probabilities by the Value classifier revealed gradual value similarities. The y-axis  
1625 represents the probability assigned to each class, colors indicate the classifier class and the x-axis represents  
1626 the trial type (the objective EV of the trial). As can be seen, the highest probability was assigned to the  
1627 class corresponding to the objective EV of the trial (i.e. when the color label matched the X axis label).  
1628  $N=35$ . **b.** Larger difference between the decoded class and the objective EV of the trial (x axis) was  
1629 related to a lower probability assigned to that class (y axis) when tested in 1D, 2D or all trials (likelihood  
1630 ratio test compared to null model: all  $p < .002, N=35$ , grey shades). Hence, the multivariate classifier  
1631 reflected gradual value similarities. Note that when  $|\text{EV} - \text{class}|=0, P_{\text{class}}$  is the probability assigned  
1632 to the objective EV of the trial. **c.**  $\text{EV}_{\text{back}}$  modulated the value similarity effect (likelihood-ratio test  
1633 with added term:  $p = .013, N=35$ ) indicating weaker similarity between EV representations for higher  
1634  $\text{EV}_{\text{back}}$ . **d.** AIC values of competing models of value probabilities classified from vmPFC. Hierarchical  
1635 model comparison of 2D trials revealed not only the differences between decoded class and objective  
1636 EV ( $|\text{EV-class}|$ ) improved model fit (likelihood-ratio test:  $p < .002, N=35$ ), but rather that  $\text{EV}_{\text{back}}$



1637 modulated this effect. Crucially, Congruency did not directly modulate the value similarity (likelihood-ratio  
1638 test:  $p = .446$ ,  $N=35$ ). Asterisks represent p-value lower than conventional .05 threshold. Light gray  
1639 bars represent models outside the hierarchical comparison. Including a 3-way interaction (with both  
1640  $EV_{\text{back}}$  and Congruency) did not provide better AIC score (-3902.5,-3901.6, respectively). A perceptual  
1641 model encoding the feature similarity between each testing trial and the training classes (irrespective of  
1642 values) did not provide a better AIC score than the value similarity model ( $|EV\text{-class}|$ ), see Fig S8 for  
1643 details. e. Main value similarity model comparison replicated when fitting the models to unaveraged data.  
1644 Adding a term for  $|EV\text{-class}|$  improved model fit (likelihood-ratio test with added term:  $\chi^2_{(1)} = 11.56$ ,  
1645  $p < .001$ ). Adding an additional term for  $|EV\text{-class}| \times EV_{\text{back}}$  further improved the fit (likelihood-ratio  
1646 test:  $\chi^2_{(1)} = 3.86$ ,  $p = .049$ ,  $N=35$ ), as in the model reported in panel c). Asterisks represent p-value  
1647 lower than conventional .05 threshold. f. Effect of Nuisance regressors on unaveraged data (t, Side,  
1648 Switch and Context). Same as Congruency and  $EV_{\text{back}}$ , all of the nuisance regressors don't discriminate  
1649 between the classes, but rather assign the same value to all three probabilities from that trial (which sum  
1650 to 1). We therefore tested if any of them modulated the value similarity effect. As can be seen in the  
1651 table, none of the nuisance regressors modulated the value similarity effect. g-i. Replication of the value  
1652 similarity model comparison reported in the main text, averaged across nuisance regressors and nested  
1653 within the levels of EV, i.e. including EV-specific intercepts nested within each within each subject level  
1654 ( $\zeta_{0_{k_v}}$ , see methods). As in the analysis reported in the Main Text, adding a main effect for  $|EV\text{-Class}|$   
1655 improves model fit (likelihood-ratio test against null model:  $\chi^2_{(1)} = 16.15$ ,  $p < .001$ ,  $N=35$ , first row)  
1656 as well as adding an additional interaction term  $|EV\text{-class}| \times EV_{\text{back}}$  (likelihood-ratio test with added  
1657 term:  $\chi^2_{(1)} = 6.16$ ,  $p = .013$ ,  $N=35$ ). Panel g shows the value similarity effect across levels of EV, panel  
1658 h and g show data and fit of the effect of  $EV_{\text{back}}$  interaction across levels of EV, respectively. Error bars  
1659 throughout the figure represent corrected within subject SEMs [46, 47]. Source data are provided as a  
1660 Source Data file.

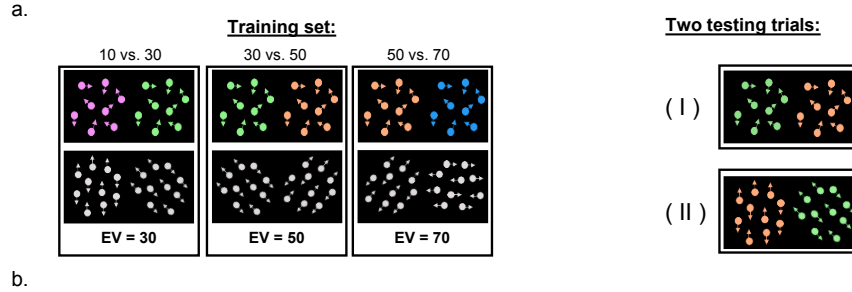

|                       | Test<br>(color) | Test<br>(motion) | EV          | EV <sub>back</sub> | Train Class<br>(color & motion) | EV-class | Feature<br>Similarity | Similarity <sub>back</sub> |
|-----------------------|-----------------|------------------|-------------|--------------------|---------------------------------|----------|-----------------------|----------------------------|
| ( I )<br>1D<br>color  | 30 50           |                  | 50          | --                 | 10 30                           | 20       | 1 1x30                | -                          |
|                       |                 |                  |             |                    | 30 50                           | 0        | 2 1x30, 1x50          | -                          |
|                       |                 |                  |             |                    | 50 70                           | 20       | 1 1x50                | -                          |
| ( II )<br>2D<br>color | 30 50           | 10 30            | 50<br>color | 30<br>motion       | 10 30                           | 20       | 3 2x30, 1x10          | 1                          |
|                       |                 |                  |             |                    | 30 50                           | 0        | 3 2x30, 1x50          | 1                          |
|                       |                 |                  |             |                    | 50 70                           | 20       | 1 1x50                | 0                          |

Figure S8: Supplementary information for perceptual similarity analysis: related to Fig. 4 and Fig. 5

1661 **Fig. S8: Supplementary information for perceptual similarity analysis: related to Fig. 4.**

1662 To control that our EV classifier was indeed sensitive to values and not only to the perceptual features

1663 the values were associated with, we compared this value similarity model to a perceptual models that

1664 merely encodes the amount of perceptual overlap between each training class and 2D testing (irrespective

1665 of their corresponding values) and found that our model explained the data best (see panel d). Replacing

1666 the EV<sub>back</sub> with a parameter that encodes the presence of the perceptual feature corresponding to EV<sub>back</sub>

1667 in the training class (Similarity<sub>back</sub>: 1 if the feature was preset, 0 otherwise) did not provide a better

1668 AIC score (-3897.1) than including the value of EV<sub>back</sub> (-3902.5). **a.** Left: training set consisting of

1669 1D trials provided for the classifier for each class (in the experiment the sides were pseudorandomised).

1670 Note that each class had the same amount of color and motion 1D trials and that the value difference

1671 between the values was always 20. Right: two examples of 2D trials that constituted the classifier test

1672 set. **b.** The table illustrates the calculation of feature similarity between classifier test and training in two

1673 example trials in one 1D and one 2D trial. Specifically, shown are the corresponding values and features

1674 for each trial with the predicted values at each class for the parameters value similarity (|EV-class|),

1675 feature similarity and similarity<sub>back</sub>. Feature similarity encodes the perceptual overlap between the shown

1676 test example and the training examples underlying with each value class. The first row shows a case in

1677 which the classifier was tested on a 1D green vs. orange color trial ( 30 vs 50, EV = 50). Considering in

1678 this case for instance the predicted probability that EV=30, the table illustrates the training example

1679 underlying the EV = 30 cases (10 vs 30, dark gray shading), the |EV-class| (here: 20, because 50-30), and

1680 the feature similarity i.e. how many features from the training class appeared in the test example (here:

1681 1). The second row shows a 2D color trial, reflecting the same value based choice between 30 and 50.

1682 The value similarity between training and test stays the same as for the 1D trial shown above. However,

1683 the feature similarity between test and training changes because of the motion features. If we take class

1684 30 for example (which is 10 vs 30, dark gray shading), the feature 30 appeared twice (color and motion)  
1685 and the feature 10 appeared once (motion), i.e. feature similarity now takes on the value 3.  $\text{Similarity}_{\text{back}}$   
1686 was used to test a perceptual-based alternative to the  $\text{EV}_{\text{back}}$  parameter.  $\text{Similarity}_{\text{back}}$  takes on 1 if the  
1687 perceptual feature corresponding to the  $\text{EV}_{\text{back}}$  appeared in the training class and 0 otherwise (red text in  
1688 table). As described in the main text, none of the perceptual-similarity encoding alternatives provided a  
1689 better fit than the reported models that focused on the values the features represent. Source data are  
1690 provided as a Source Data file.

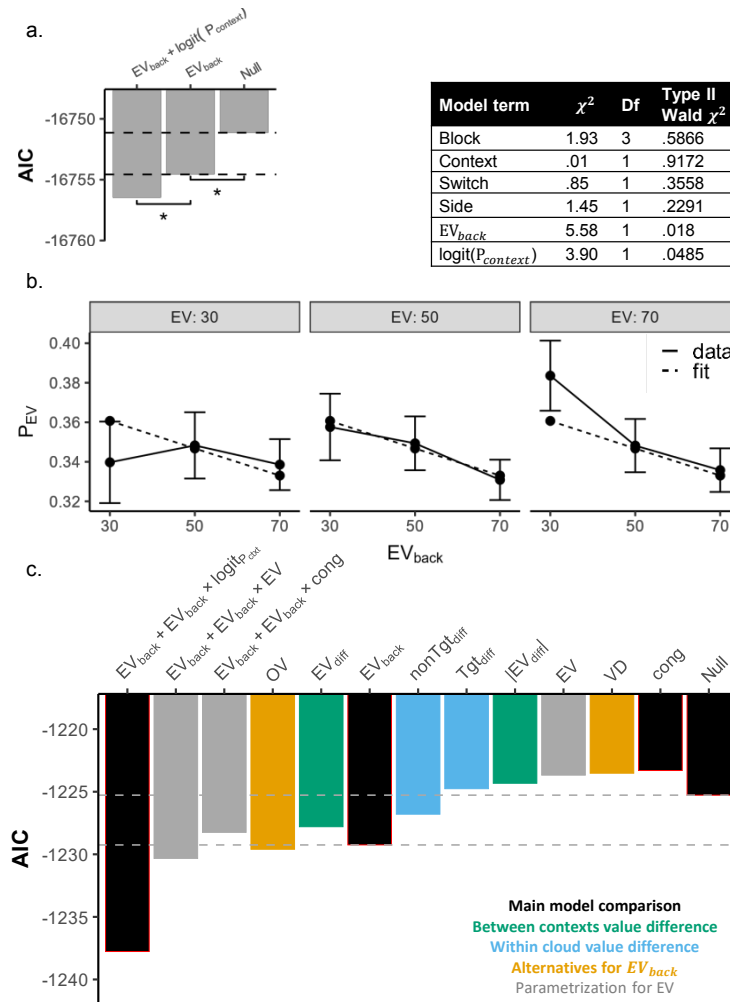

Figure S9: Modelling probability assigned to the EV class.

1691 **Fig. S9:** Modelling probability assigned to the EV class: related to Fig. 5.

1692 **a.** We replicated the main results using the unaveraged data. The Null model was:  $P_{t,EV}^k = \beta_0 + \gamma_{0k} +$

1693  $\nu_1 side(t) + \nu_2 switch(t) + \nu_3 context(t)$ , where  $P_{t,EV}^k$  is the probability assigned to the class corresponding

1694 to the EV of trial  $t$  for subject  $k$ ,  $\beta_0$  and  $\gamma_{0k}$  represent global and subject-specific intercepts. Side, Switch

1695 and Context are the same as in the RT model (Eq. 2); None of these variables had a main effect,  $p > 0.4$

1696 (Type II Wald  $\chi^2$  tests,  $N=35$ , see table, right),  $N=35$ . The factor *trial* could not be included due

1697 to model convergence issues. Adding a term representing  $EV_{back}$  improved model fit (likelihood-ratio

1698 test including term:  $\chi_{(1)}^2 = 5.42$ ,  $p = .019$ ). Adding an additional term for context decodability further

1699 improved the fit (likelihood-ratio test with added term:  $\chi_{(1)}^2 = 3.9$ ,  $p = .048$ ). The table (right) displays

1700 the Type 2 Wald  $\chi^2$  test for all main effects from the model. **b.** Depicted is the effect of  $EV_{back}$  (x-axis)

1701 on the probability assigned to the EV class ( $P_{EV}$ , y axis). Solid lines represent the data and dashed lines

1702 the model fit of a model that included random effects of subject and EV nested within subject (data

1703 averaged across nuisance regressors, adding a main effect for  $EV_{back}$  improved model fit (likelihood-ratio

1704 test with added term:  $\chi_{(1)}^2 = 5.99$ ,  $p = .014$ ,  $N=35$ ). Error bars represent corrected within subject SEMs

1705 [46, 47]. c. Similar to our analysis of alternative models of RT, we clustered models reflecting alternative  
1706 explanations into three conceptual groups (see color legend; cf. Fig. S3a). All models were fitted to the  
1707 probability assigned to the objective EV in accurate 2D trials, similar to Eq. 7. Each column represents the  
1708 AIC (y-axis) of a different model (x-axis) where the labels on the x-axis depict all the main effects included  
1709 in that specific model (i.e. added to the Null, i.e. Eq. 7 without any main effects). We found no evidence  
1710 that any other parameters explain the data better than the ones we used in the main text. Specifically,  
1711 only including main effect of  $EV_{back}$ , Overall Value of the irrelevant values (OV) and the difference of  
1712 both EVs ( $EV_{diff}$ ) provided a better AIC score than the Null model. Note that adding OV (-1229.6) only  
1713 slightly surpassed  $EV_{back}$  (-1229.26). Crucially, the correlation of  $EV_{back}$  and OV is very high (Pearson  
1714 correlation:  $\rho = .87$ , see main text). We then looked at possible interactions with the  $EV_{back}$  effect.  
1715 Congruency did not seem to modulate the main effect of  $EV_{back}$  and adding an interaction term  $EV \times$   
1716  $EV_{back}$  provided a slightly better AIC (-1230.33), yet this effect was not significant (likelihood-ratio test:  
1717  $\chi^2_{(1)} = 3.08$ ,  $p = .079$ ). Section (b) also visualizes this effect. Lastly, adding a term for the Context  
1718 decodability provided the lowest (i.e. best) AIC score. This exploratory analysis revealed that our model  
1719 provides the best fit for  $P_{EV}$  in all cases except when  $EV_{back}$  was replaced with the sum of irrelevant  
1720 values (-1229.6, -1229.2, respectively, Fig. S9). In contrast, AIC scores of behavioral models' favored  
1721  $EV_{back}$  as modulator of Congruency, over the sum of irrelevant values (-6626.6, -6619.9, respectively,  
1722 Fig. S3). However, both parameters were strongly correlated ( $\rho = .87$ ,  $\sigma = .004$ ) and therefore our task  
1723 was not designed to distinguish between these two alternatives. Source data are provided as a Source  
1724 Data file.

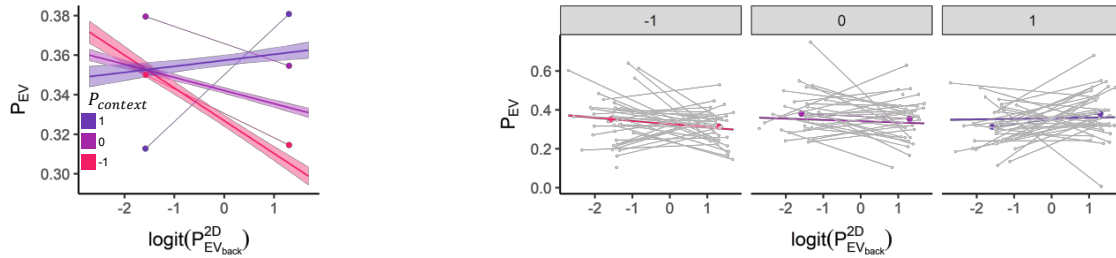

Figure S10: Main effects and corresponding data, fMRI effects, related to Fig. 5

1725 Fig. S10: Main effects and corresponding data, fMRI effects, related to Fig. 5 Since the effects  
 1726 describe data and predictors that are beta-distributed, visualization of simply imposing the true data over  
 1727 the predictions is not very informative. To solve this, and only for visualization purposes here and in the  
 1728 main paper, we took for each effect the mean of top and bottom 20% of the true probabilities from the  
 1729 classifiers (not transformed) for each participant. Context signal ( $P_{context}$ ) moderated the negative effect  
 1730 of  $EV_{back}$  decodability ( $P_{EV_{back}}^{2D}$ ) on EV decodability ( $P_{EV}$ ). Model prediction of  $\text{multilogit}(P_{EV_{back}}^{2D}) \times$   
 1731  $P_{context}$  (left, taken from Fig. 5h.) and top and bottom 20% for each subject for three levels of  $P_{context}$   
 1732 (right, the split to three levels is for visualization whereas in the model the predictor was continuous). In  
 1733 all panels error bands represent the 89% confidence interval. Source data are provided as a Source Data  
 1734 file.

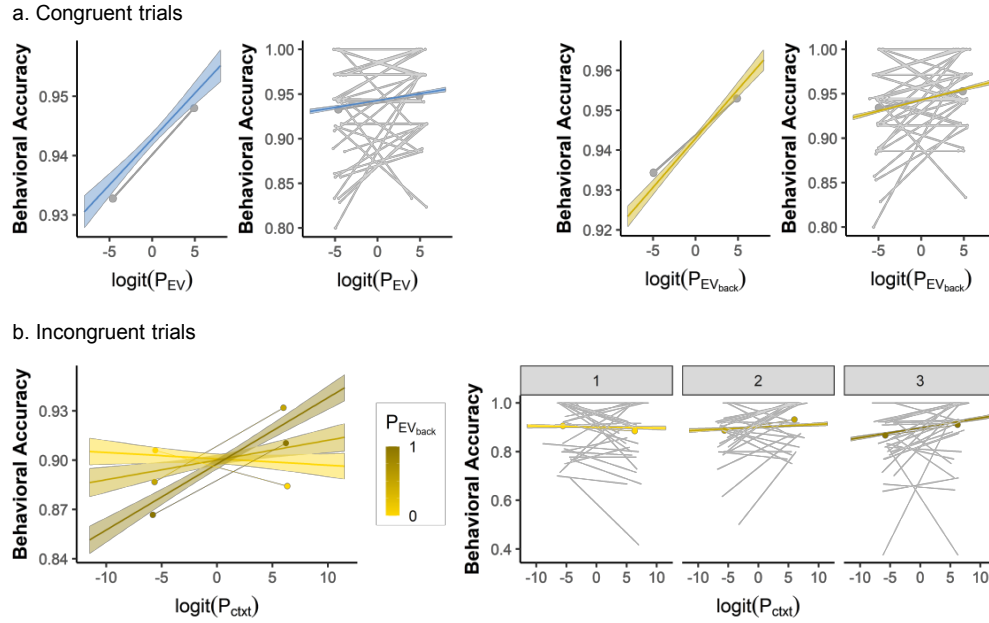

Figure S11: Main effects and corresponding data, link of fMRI to behavioral accuracy, related to Fig. 6

1735 Fig. S11: Main effects and corresponding data, link of fMRI to behavioral accuracy, related to  
 1736 Fig. 6 Since the effects describe data and predictors that are beta-distributed, visualization of simply  
 1737 imposing the true data over the predictions is not very informative. To solve this, and only for visualization  
 1738 purposes here and in the main paper, we took for each effect the mean of top and bottom 20% of the  
 1739 true probabilities from the classifiers (not transformed) for each participant. a Congruent trials. Stronger  
 1740 EV decodability (left) and stronger  $EV_{back}$  decodability (right) increases behavioral accuracy. The left  
 1741 side of each panel is taken from Fig. 6. The right side depicts the same plot with additional individual  
 1742 subject-specific lines that represent the top and bottom 20% of the data for each subject (meaning that  
 1743 the gray line on the left side is the mean of the individual lines on the right). b. Incongruent trials.  
 1744 Stronger Context decodability ( $P_{context}$ ) increases behavioral accuracy, modulated by  $EV_{back}$  decodability  
 1745 ( $P_{EV_{back}}$ ) such that when  $P_{EV_{back}}$  was low, the effect of  $P_{context}$  diminished. For visualization purpose,  
 1746 Right panel is split by 3 equal sized bins of  $P_{EV_{back}}$  (left is the lowest bin, increasing to the right, the split  
 1747 to three levels is for visualization whereas in the model the predictor was continuous). In all panels error  
 1748 bands represent the 89% confidence interval. Source data are provided as a Source Data file.

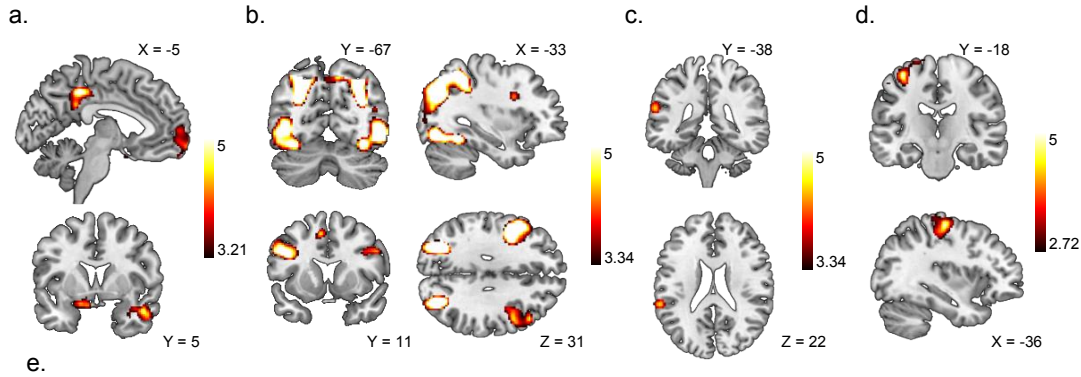

| Cue (split)    | Accurate Stimuli |      | Non-accurate stimuli | Outcome                       | + 13 fmriprep      | + 18 Physiological |
|----------------|------------------|------|----------------------|-------------------------------|--------------------|--------------------|
| Color + Motion | + 1D             | + 2D | + Wrong + no-answer  | + Correct + wrong + no-answer | See online methods |                    |

  

| GLM  | Parametric modulators |                                                      | Parametric modulators (demeaned):     |
|------|-----------------------|------------------------------------------------------|---------------------------------------|
|      | 1D                    | 2D                                                   |                                       |
| GLM1 | <i>EV</i>             | <i>EV</i>                                            | {30, 50, 70}                          |
| GLM2 | <i>EV</i>             | <i>EV</i> + <i>EV<sub>back</sub></i> + Congruency    | {+1, -1}                              |
| GLM3 | <i>EV</i>             | <i>EV</i> + ( <i>EV<sub>back</sub></i> x Congruency) | {30, 50, 70}                          |
| GLM4 | <i>EV</i>             | ( <i>EV</i> x Congruency)                            | {-70, -50, -30, 30, 50, 70}           |
|      |                       |                                                      | <i>EV<sub>back</sub></i> x Congruency |
|      |                       |                                                      | <i>EV</i> x Congruency                |

  

| GLM  | Contrasts: below threshold, * <i>p</i> <0.005, ** <i>p</i> <0.001                            |
|------|----------------------------------------------------------------------------------------------|
| GLM1 | 2D > 1D**, 1D > 2D*                                                                          |
| GLM2 | Congruency > 0, Congruency < 0, <i>EV<sub>back</sub></i> > 0, <i>EV<sub>back</sub></i> < 0** |
| GLM3 | ( <i>EV<sub>back</sub></i> x Congruency) > 0, ( <i>EV<sub>back</sub></i> x Congruency) < 0 * |
| GLM4 | ( <i>EV</i> x Congruency) > 0, ( <i>EV</i> x Congruency) < 0                                 |

Figure S12: Main univariate results

1749 Fig. S12: Main univariate results.

1750 The main analyses indicated that multiple value expectations are represented in parallel within vmPFC.  
 1751 Here, we asked whether whole-brain univariate analyses could also uncover evidence for processing of  
 1752 multiple value representations. In particular, we asked whether we could find evidence for a single  
 1753 representation that integrates the multiple value expectations into one signal. To this end, we first  
 1754 analyzed the fMRI data using GLMs with separate onsets and EV parametric modulators for 1D and 2D  
 1755 trials (see below for detailed description).

1756 a. The intersection of the EV parametric modulators of 1D and 2D trials ( $EV_{1D} > 0 \cap EV_{2D} > 0$ ) revealed  
 1757 several regions including right Amygdala, bilateral Hippocampus and Angular Gyrus, the lateral and medial  
 1758 OFC and overlapping vmPFC. Hence, the vmPFC signaled the expected value of the current context in  
 1759 both trial types as expected – even though 2D trials likely required higher attentional demands (see panel  
 1760 b). Voxelwise threshold  $p < .001$ , FDR cluster-corrected. b 2D trials were characterized by increased  
 1761 activation in an attentional network involving occipital, parietal and frontal clusters ( $2D > 1D$ ,  $p < .001$   
 1762 FDR cluster corrected).



1763 Next, we searched for univariate evidence of processing irrelevant values by modifying the parametric  
1764 modulators assigned to 2D trials in the above-mentioned GLM. Specifically, in addition to  $EV_{2D}$ , we  
1765 added Congruency (+1 for congruent and -1 for incongruent) and  $EV_{back}$  as additional modulators of  
1766 the activity in 2D trials. This GLM revealed no evidence for a Congruency contrast anywhere in the  
1767 brain (even at a liberal voxel-wise threshold of  $p < .005$ ). c. An unexpected negative effect of  $EV_{back}$   
1768 was found in the Superior Temporal Gyrus ( $p < .001$ ), i.e. the higher the  $EV_{back}$ , the lower the signal  
1769 in this region.  $p < .001$ , FDR cluster-corrected. No overlap with (b), see [S13](#). We note that this is  
1770 similar to previous reports implicating this region in modelling choices of others ([106](#)). Notably, unlike  
1771 the multivariate analysis, no effect in any frontal region was observed.

1772 Motivated by our behavioral analysis, we then turned to look for the interaction of each relevant or  
1773 irrelevant value with Congruency. An analysis including only a Congruency  $\times$   $EV_{2D}$  parametric modulator  
1774 revealed no cluster (even at  $p < .005$ ).

1775 d. A cluster in the primary motor cortex was negatively modulated by Congruency  $\times$   $EV_{back}$ , i.e. the  
1776 difference between Incongruent and Congruent trials increased with higher  $EV_{back}$ , similar to the RT  
1777 effect and akin to a response conflict,  $p < .005$ , FDR cluster-corrected. No overlap with (b), see [S13](#)

1778 Lastly, we re-ran all above analyses concerning Congruency and  $EV_{back}$  only inside the identified vmPFC  
1779 ROI. No voxel survived for Congruency,  $EV_{back}$  nor the interactions, even at threshold of  $p < .005$ .

1780 e. Visualization of GLMs. The tables depict the structure of GLMs1-4 which were mainly motivated  
1781 by the behavioral analysis; onset regressors are shown in the top table, parametric modulators assigned  
1782 to 1D and 2D onsets (middle-left), the values they were modeled with (demeaned, middle-right) are  
1783 shown below. The contrasts of interest are shown in the bottom table. The GLMs differed only in their  
1784 modulations of the 2D trials: GLM1 included only modulators of the objective outcome, GLM2 included  
1785 one modulator for Congruency and one for  $EV_{back}$ , GLM3 included a modulator for the Congruency  $\times$   
1786  $EV_{back}$  interaction and GLM4 included instead of the EV modulator a modulator of the EV  $\times$  Congruency  
1787 interaction. In the contrast table (bottom) contrasts that only revealed effects at a liberal threshold of  
1788  $p < .005$  are marked with one star, and contrasts significant at  $p < .001$  are marked with two stars. All  
1789 statistical tests represent one-sided t-test either larger or smaller than 0, see lower table in panel e for  
1790 details of each contrast.

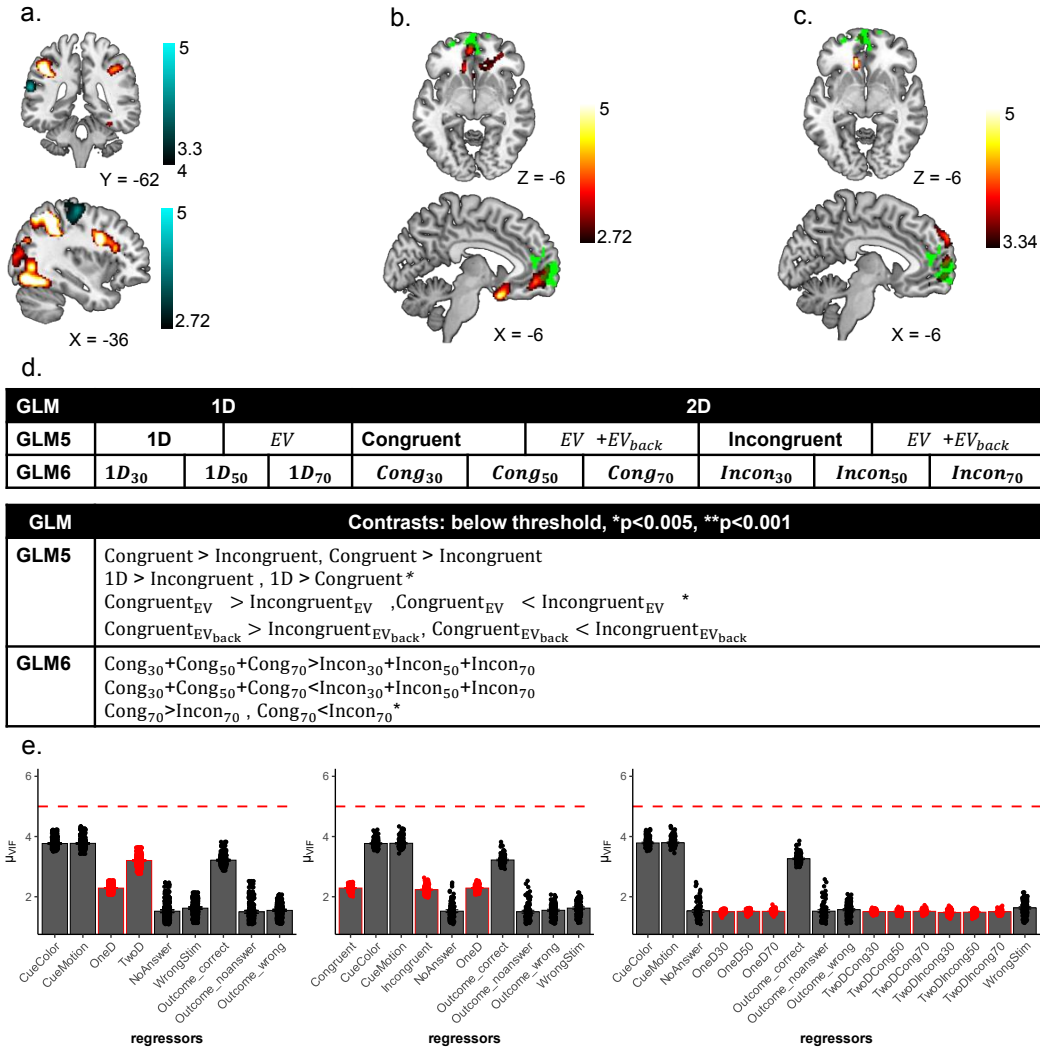

Figure S13: Additional univariate results

1791 Fig. S13: Additional univariate results.

1792 a. Overlap of effects of EV<sub>back</sub> and trial type (2D > 1D). Main effects of EV<sub>back</sub> < 0 (GLM2,  $p < 0.001$   
 1793 FDR cluster corrected, top, blue shades) and EV<sub>back</sub> X Congruency < 0 (GLM3,  $p < 0.005$ , FDR cluster  
 1794 corrected, bottom, blue shades, t values) did not overlap with the 2D network (red shades in both panels,  
 1795 t values). b. Main effect of 1D > 2D. A stronger signal in vmPFC for 1D over 2D trials revealed weak  
 1796 activation in a PFC network ( $p < .005$ , red shades, t values). This included the vmPFC (our functional  
 1797 ROI is depicted in green). Interestingly, at a liberal threshold of  $p < .005$  we found stronger activity  
 1798 for 1D over 2D trials in a cluster overlapping with vmPFC (1D > 2D,  $p < .005$ ). Although this could  
 1799 be interpreted as a general preference for 1D trials, splitting the 2D onsets by Congruency revealed no  
 1800 cluster for 1D > Incongruent (also at  $p < .005$ ) but a stronger cluster for 1D > Congruent ( $p < .001$ , Fig.  
 1801 S13). In other words, the signal in the vmPFC was weaker when both contexts indicate the same action,  
 1802 compared to when only one context is present. c. Stronger signal in vmPFC for 1D over congruent

1803 but not incongruent trials. When we split the onset of the 2D into Congruent and Incongruent trials  
1804 (GLM5), we found no significant cluster for the 1D > Incongruent contrast, but an overlapping and  
1805 stronger cluster for the 1D > Congruent contrast ( $p < .001$ , FDR cluster corrected, red shades, t values).  
1806 We found very similar results when contrasting the onsets of 1D and Congruent in GLM6 (not presented),  
1807 confirming the same results also when controlling for the number of trials for each level of EV (i.e.  
1808  $1D_{30}+1D_{50}+1D_{70} > \text{Congruent}_{30}+\text{Congruent}_{50}+\text{Congruent}_{70}$ ). Our functional ROI is depicted in green.  
1809 **d.** Additional exploratory analyses such as contrasting the onsets of congruent and incongruent trials,  
1810 confirmed the lack of Congruency modulation in any frontal region. Specifically, We constructed additional  
1811 GLMs to verify the results of GLMs 1-4. In GLM5 we split the onset of 2D trials into congruent and  
1812 incongruent trials and assigned a parametric modulator of EV and  $EV_{\text{back}}$  to each. As in GLM2, we  
1813 found no effect of congruency; no voxel survived when contrasting the congruency onsets nor their  $EV_{\text{back}}$   
1814 modulators. Only the contrast  $\text{Congruent}_{EV} < \text{Incongruent}_{EV}$  revealed a weak cluster in the right visual  
1815 cortex (peak 38,-80,16,  $p < 0.005$  not presented). In GLM6 we split the onsets of the 1D and 2D trials by  
1816 levels of EV and the 2D trials further by Congruency. No Congruency main effect survived correction.  
1817 Only when the onsets of Congruent and Incongruent 2D trials with  $EV=70$  were contrasted, a cluster in  
1818 the primary motor cortex was found (also at  $p < .005$ ). Unsurprisingly, this cluster largely overlapped  
1819 with the  $\text{Congruency} \times EV_{\text{back}}$  effect reported in the Main Text. Except the contrast of 1D > Congruent  
1820 (see Main Text) none of the other contrasts shown in the table revealed any cluster, even at  $p < .005$ .  
1821 All statistical tests in panels a-d represent one-sided t-test either larger or smaller than 0, see lower table  
1822 in panel d for details of each contrast. **e.** Variance Inflation Factor (VIF) of the different regressors in  
1823 all GLMs. None of the regressors (x axis) had a mean VIF value (y axis) across blocks and participants  
1824 above the threshold of 4. Regressors involved in GLMs 1-4 shown on the left (Fig. S12); GLM5 and  
1825 GLM6 are shown in the middle and on the right, respectively. See Methods for details.  $N=35$ . Error bars  
1826 represent corrected within subject SEMs [46, 47]

| Anatomical region                                                                        |          | Peak (MNI) |     |     |              | peak       |             |  |
|------------------------------------------------------------------------------------------|----------|------------|-----|-----|--------------|------------|-------------|--|
| Label                                                                                    | Distance | X          | Y   | Z   | Cluster size | t\$_{34}\$ | p\$_{unc}\$ |  |
| <b>EV<sub>1D</sub> &gt; 0 ∩ EV<sub>2D</sub> &gt; 0 , p&lt;001, k = 280</b>               |          |            |     |     |              |            |             |  |
| R Inferior Temporal Gyrus                                                                | 4.90     | 60         | -18 | -14 | 1770         | 6.53       | < .0001     |  |
| R Middle Temporal Gyrus                                                                  | 0        | 50         | -6  | -20 |              | 5.49       | < .0001     |  |
| R Middle Temporal Gyrus                                                                  | 0        | 56         | -30 | -8  |              | 5.27       | < .0001     |  |
| R Superior Frontal Gyrus, medial Orbital                                                 | 0        | 8          | 68  | -12 | 1045         | 6.09       | < .0001     |  |
| L Inferior Frontal Gyrus pars orbitalis                                                  | 0        | -50        | 30  | -10 |              | 4.67       | < .0001     |  |
| L Superior Frontal Gyrus                                                                 | 0        | -24        | 58  | -6  |              | 4.35       | < .0001     |  |
| L Middle Temporal Gyrus                                                                  | 0        | -60        | -30 | -6  | 1318         | 5.85       | < .0001     |  |
| L Middle Temporal Gyrus                                                                  | 0        | -66        | -24 | -8  |              | 5.78       | < .0001     |  |
| L Hippocampus                                                                            | 2        | -40        | -26 | -12 |              | 4.96       | < .0001     |  |
| L Angular Gyrus                                                                          | 0        | -50        | -60 | 38  | 875          | 5.58       | < .0001     |  |
| L Angular Gyrus                                                                          | 0        | -46        | -52 | 30  |              | 4.86       | < .0001     |  |
| L Angular Gyrus                                                                          | 0        | -46        | -70 | 34  |              | 3.66       | .0002       |  |
| L Middle Cingulate & Paracingulate Gyri                                                  | 0        | -4         | -40 | 44  | 1065         | 5.51       | < .0001     |  |
| L Posterior Cingulate Gyrus                                                              | 0        | 0          | -44 | 32  |              | 4.52       | < .0001     |  |
| R Middle Cingulate & Paracingulate Gyri                                                  | 0        | 12         | -48 | 32  |              | 4.52       | < .0001     |  |
| L Hippocampus                                                                            | 0        | -18        | -6  | -20 | 280          | 4.59       | < .0001     |  |
| L Olfactory Cortex                                                                       | 2        | -10        | 6   | -18 |              | 4.34       | < .0001     |  |
| R Angular Gyrus                                                                          | 0        | 50         | -56 | 30  | 474          | 4.27       | < .0001     |  |
| R Superior Temporal Gyrus                                                                | 0        | 62         | -54 | 22  |              | 4.26       | < .0001     |  |
| <b>2D &gt; 1D, p&lt;.001, k=158</b>                                                      |          |            |     |     |              |            |             |  |
| L Superior Occipital Gyrus                                                               | 2.83     | -28        | -76 | 38  | 5367         | 8.71       | < .0001     |  |
| L Inferior Occipital Gyrus                                                               | 0        | -48        | -76 | -4  |              | 7.69       | < .0001     |  |
| L Superior Parietal Gyrus                                                                | 0        | -28        | -66 | 52  |              | 7.62       | < .0001     |  |
| L Precentral Gyrus                                                                       | 0        | -46        | 4   | 30  | 1766         | 7.69       | < .0001     |  |
| L Inferior Frontal Gyrus, triangular part                                                | 0        | -44        | 34  | 22  |              | 5.88       | < .0001     |  |
| L Inferior Frontal Gyrus, triangular part                                                | 0        | -40        | 26  | 22  |              | 5.59       | < .0001     |  |
| R Inferior Parietal Gyrus                                                                | 0        | 32         | -56 | 54  | 3876         | 7.23       | < .0001     |  |
| R Fusiform Gyrus                                                                         | 0        | 30         | -76 | -10 |              | 7.16       | < .0001     |  |
| R Inferior Temporal Gyrus                                                                | 0        | 48         | -70 | -8  |              | 7.13       | < .0001     |  |
| R Inferior Frontal Gyrus, triangular part                                                | 0        | 48         | 26  | 26  | 616          | 5.17       | < .0001     |  |
| R Precentral Gyrus                                                                       | 0        | 48         | 8   | 32  |              | 4.50       | < .0001     |  |
| R Precentral Gyrus                                                                       | 0        | 38         | 2   | 30  |              | 4.23       | .0001       |  |
| L Supplementary Motor Area                                                               | 0        | -8         | 14  | 50  | 159          | 4.69       | < .0001     |  |
| <b>EV<sub>back</sub>&lt;0, p&lt;.001, k = 240</b>                                        |          |            |     |     |              |            |             |  |
| L SupraMarginal Gyrus                                                                    | 2        | -62        | -38 | 22  | 240          | 4.50       | < .0001     |  |
| L Superior Temporal Gyrus                                                                | 0        | -60        | -32 | 10  |              | 4.26       | .0001       |  |
| L Superior Temporal Gyrus                                                                | 0        | -60        | -22 | 8   |              | 3.71       | .0004       |  |
| <b>Congruency × EV<sub>back</sub>&lt;0, p&lt;.005, k=632</b>                             |          |            |     |     |              |            |             |  |
| L Postcentral Gyrus                                                                      | 6.93     | -36        | -18 | 60  | 632          | 4.03       | .0002       |  |
| L Postcentral Gyrus                                                                      | 0        | -48        | -22 | 52  |              | 3.11       | .0019       |  |
| L Postcentral Gyrus                                                                      | 0        | -24        | -20 | 74  |              | 3.08       | .0020       |  |
| <b>EV<sub>1D</sub> + EV<sub>2D</sub> &gt; 0, within functional ROI, p&lt;.001, k=979</b> |          |            |     |     |              |            |             |  |
| R Anterior Orbital Gyrus                                                                 | 4.47     | 8          | 68  | -12 | 979          | 7.89       | < .0001     |  |
| L Superior Frontal Gyrus, Medial Orbital                                                 | 2        | -6         | 68  | -12 |              | 6.86       | < .0001     |  |
| L Superior Frontal Gyrus, Medial                                                         | 0        | -10        | 64  | 2   |              | 5.86       | < .0001     |  |

**Table S1: Detailed univariate results:** Clusters for whole brain univariate analysis, related to Fig. S12. Presented are the closest labels to the local maxima of each cluster and each contrast using AAL3v1 [99-101]. All contrasts are FDR cluster corrected. p and k values presented for each cluster. p values represent one sided t-test.

Effect sizes and confidence intervals for best explaining models In all the following tables, CI marks Confidence Interval, CII and Clh the low and high ends of the confidence interval respectively. P-values in all tables showing best explaining models represent Type II Wald  $\chi^2$  tests.

| Parameter                              | Coef  | CI   | CII   | Clh   | t      | df   | er   | p               | Effects | Std <sub>Coef</sub> | Std <sup>CI</sup> <sub>Coef</sub> | Std <sup>CIh</sup> <sub>Coef</sub> |
|----------------------------------------|-------|------|-------|-------|--------|------|------|-----------------|---------|---------------------|-----------------------------------|------------------------------------|
| 1 (Intercept)                          | 0.08  | 0.95 | 0.06  | 0.11  | 6.48   | 9035 | 0.00 | fixed           | fixed   | 0.17                | 0.04                              | 0.29                               |
| 2 Switch                               | -0.01 | 0.95 | -0.01 | -0.01 | -6.57  | 9035 | 0.00 | fixed           | fixed   | -0.06               | -0.08                             | -0.04                              |
| 3 Trial                                | -0.01 | 0.95 | -0.02 | -0.01 | -6.92  | 9035 | 0.00 | fixed           | fixed   | -0.06               | -0.08                             | -0.04                              |
| 4 side [R]                             | -0.01 | 0.95 | -0.01 | -0.00 | -2.29  | 9035 | 0.02 | fixed           | fixed   | -0.04               | -0.08                             | -0.01                              |
| 5 Context [M]                          | -0.07 | 0.95 | -0.08 | -0.07 | -20.73 | 9035 | 0.00 | fixed           | fixed   | -0.37               | -0.40                             | -0.33                              |
| 6 EV                                   | -0.07 | 0.95 | -0.08 | -0.07 | -29.14 | 9035 | 0.00 | fixed           | fixed   | -0.36               | -0.39                             | -0.34                              |
| 7 Congruency [1]                       | 0.02  | 0.95 | 0.01  | 0.03  | 5.40   | 9035 | 0.00 | fixed           | fixed   | 0.10                | 0.06                              | 0.13                               |
| 8 Congruency [-1] * EV <sub>back</sub> | -0.01 | 0.95 | -0.01 | -0.00 | -2.07  | 9035 | 0.04 | fixed           | fixed   | -0.03               | -0.05                             | -0.00                              |
| 9 Congruency [1] * EV <sub>back</sub>  | 0.01  | 0.95 | 0.00  | 0.01  | 3.73   | 9035 | 0.00 | fixed           | fixed   | 0.05                | 0.02                              | 0.07                               |
| 10 EV * Congruency [1]                 | 0.01  | 0.95 | 0.00  | 0.01  | 2.08   | 9035 | 0.04 | fixed           | fixed   | 0.04                | 0.00                              | 0.07                               |
| 11                                     | 0.07  | 0.95 |       |       |        |      |      | random-sub      |         |                     |                                   |                                    |
| 12                                     | 0.17  | 0.95 |       |       |        |      |      | random-Residual |         |                     |                                   |                                    |

Table S2: Effect sizes and confidence intervals for best explaining RT model

| Parameter                      | Coef  | CI   | CII   | Clh   | z      | p    | Effects         | Std <sub>Coef</sub> | Std <sup>CI</sup> <sub>Coef</sub> | Std <sup>CIh</sup> <sub>Coef</sub> |
|--------------------------------|-------|------|-------|-------|--------|------|-----------------|---------------------|-----------------------------------|------------------------------------|
| 1 (Intercept)                  | -0.65 | 0.95 | -0.69 | -0.61 | -30.83 | 0.00 | fixed           | -0.65               | -0.69                             | -0.61                              |
| 2 EV <sub>back</sub>           | -0.05 | 0.95 | -0.08 | -0.01 | -2.58  | 0.01 | fixed           | -0.05               | -0.08                             | -0.01                              |
| 3 logit(P <sub>context</sub> ) | 0.06  | 0.95 | 0.02  | 0.10  | 3.25   | 0.00 | fixed           | 0.06                | 0.02                              | 0.10                               |
| 4                              | 0.06  | 0.95 | 0.02  | 0.18  |        |      | random-sub      |                     |                                   |                                    |
| 5                              | 8.79  | 0.95 |       |       |        |      | random-Residual |                     |                                   |                                    |

Table S3: Effect sizes and confidence intervals for best explaining fMRI model (main model)

| Parameter                                                       | Coef  | CI   | CIh   | Clh   | z      | p    | Effects                        | Std <sub>Coef</sub> | Std <sup>CI</sup> <sub>Coef</sub> | Std <sup>CIh</sup> <sub>Coef</sub> |
|-----------------------------------------------------------------|-------|------|-------|-------|--------|------|--------------------------------|---------------------|-----------------------------------|------------------------------------|
| 1 (Intercept)                                                   | -0.65 | 0.95 | -0.69 | -0.61 | -31.36 | 0.00 | fixed                          | -0.65               | -0.69                             | -0.61                              |
| 2 $\text{logit}(P_{context})$                                   | 0.06  | 0.95 | 0.02  | 0.09  | 3.02   | 0.00 | fixed                          | 0.06                | 0.02                              | 0.09                               |
| 3 $\text{mlogit}(P_{EV_{back}})$                                | -0.03 | 0.95 | -0.07 | 0.01  | -1.63  | 0.10 | fixed                          | -0.03               | -0.07                             | 0.01                               |
| 4 $\text{mlogit}(P_{EV_{back}}) * \text{mlogit}(P_{EV_{back}})$ | 0.04  | 0.95 | 0.00  | 0.08  | 2.17   | 0.03 | fixed                          | 0.04                | 0.00                              | 0.08                               |
| 5                                                               | 0.05  | 0.95 | 0.00  | 0.62  |        |      | random-EV <sub>back</sub> :sub |                     |                                   |                                    |
| 6                                                               | 0.04  | 0.95 | 0.00  | 0.70  |        |      | random-sub                     |                     |                                   |                                    |
| 7                                                               | 8.82  | 0.95 | 8.16  | 9.54  |        |      | random-Residual                |                     |                                   |                                    |

Table S4: Effect sizes and confidence intervals for best explaining fMRI model (model nested in EV<sub>back</sub>)

| Parameter                                | Coef  | CI   | CIh   | Clh   | z      | df_error | p    | Effects         | Std <sub>Coef</sub> | Std <sup>CI</sup> <sub>Coef</sub> | Std <sup>CIh</sup> <sub>Coef</sub> |
|------------------------------------------|-------|------|-------|-------|--------|----------|------|-----------------|---------------------|-----------------------------------|------------------------------------|
| 1 (Intercept)                            | 0.01  | 0.95 | 0.01  | 0.02  | 30.66  | Inf      | 0.00 | fixed           | 0.01                | 0.01                              | 0.02                               |
| 2 EV <sub>diagonal</sub>                 | -0.00 | 0.95 | -0.00 | 0.00  | -1.77  | Inf      | 0.08 | fixed           | -0.00               | -0.00                             | 0.00                               |
| 3 EV <sub>diagonal</sub> <sub>back</sub> | -0.00 | 0.95 | -0.00 | -0.00 | -15.61 | Inf      | 0.00 | fixed           | -0.00               | -0.00                             | -0.00                              |
| 4                                        | 0.00  | 0.95 | 0.00  | 0.00  |        |          |      | random-freq:sub |                     |                                   |                                    |
| 5                                        | 0.00  | 0.95 | 0.00  | 0.00  |        |          |      | random-sub      |                     |                                   |                                    |
| 6                                        | 0.27  | 0.95 | 0.27  | 0.27  |        |          |      | random-freq     |                     |                                   |                                    |

Table S5: Effect sizes and confidence intervals for best explaining RSA model - diagonal models

| Parameter     | Coef  | CI   | CIh   | Clh   | z      | df_error | p    | Effects         | Std <sub>Coef</sub> | Std <sup>CI</sup> <sub>Coef</sub> | Std <sup>CIh</sup> <sub>Coef</sub> |
|---------------|-------|------|-------|-------|--------|----------|------|-----------------|---------------------|-----------------------------------|------------------------------------|
| 1 (Intercept) | 0.01  | 0.95 | 0.01  | 0.02  | 30.66  | Inf      | 0.00 | fixed           | 0.01                | 0.01                              | 0.02                               |
| 2 VDev        | -0.00 | 0.95 | -0.00 | -0.00 | -2.17  | Inf      | 0.03 | fixed           | -0.00               | -0.00                             | -0.00                              |
| 3 VDevback    | -0.00 | 0.95 | -0.00 | -0.00 | -15.93 | Inf      | 0.00 | fixed           | -0.00               | -0.00                             | -0.00                              |
| 4             | 0.00  | 0.95 | 0.00  | 0.00  |        |          |      | random-freq:sub |                     |                                   |                                    |
| 5             | 0.00  | 0.95 | 0.00  | 0.00  |        |          |      | random-sub      |                     |                                   |                                    |
| 6             | 0.27  | 0.95 | 0.27  | 0.27  |        |          |      | random-freq     |                     |                                   |                                    |

Table S6: Effect sizes and confidence intervals for best explaining RSA model - value difference models
